- Ranieri VM: Pulmonary atelectasis during low stretch ventilation: "Open lung" *versus* "lung rest" strategy. *Crit Care Med* 2009; 37:1046–53
44. Henzler D, Hochhausen N, Dembinski R, Orfao S, Rossaint R, Kuhlen R: Parameters derived from the pulmonary pressure volume curve, but not the pressure time curve, indicate recruitment in experimental lung injury. *Anesth Analg* 2007; 105:1072–8
  45. Rahn H, Otis AB: The pressure-volume diagram of the thorax and lung. *Am J Physiol* 1946; 146:161–78
  46. Agostoni E, Mead J: Statics of the respiratory system, *Handbook of Physiology*, Section 3. Respiration. Vol 1. Edited by Fenn WO, Rahn H. Washington, American Physiological Society, 1964, pp 387–9
  47. Agostoni E, Hyatt RE: Static behavior of the respiratory system, *Handbook of Physiology*, Section 3. Respiration. Vol III. Mechanics of Breathing, Part 1. Edited by Fisherman AP, Macbklem PT, Mead J, Geiger SR. Bethesda, American Physiological Society, 1986, pp 113–30
  48. Mergoni M, Martelli A, Volpi A, Primavera S, Zuccoli P, Rossi A: Impact of positive end-expiratory pressure on chest wall and lung pressure-volume curve in acute respiratory failure. *Am J Respir Crit Care Med* 1997; 156(3 Pt 1): 846–54

## ANESTHESIOLOGY REFLECTIONS FROM THE WOOD LIBRARY-MUSEUM

### Dr. Joseph Bryant's Role in President Grover Cleveland's Secret Anesthesia and Surgery

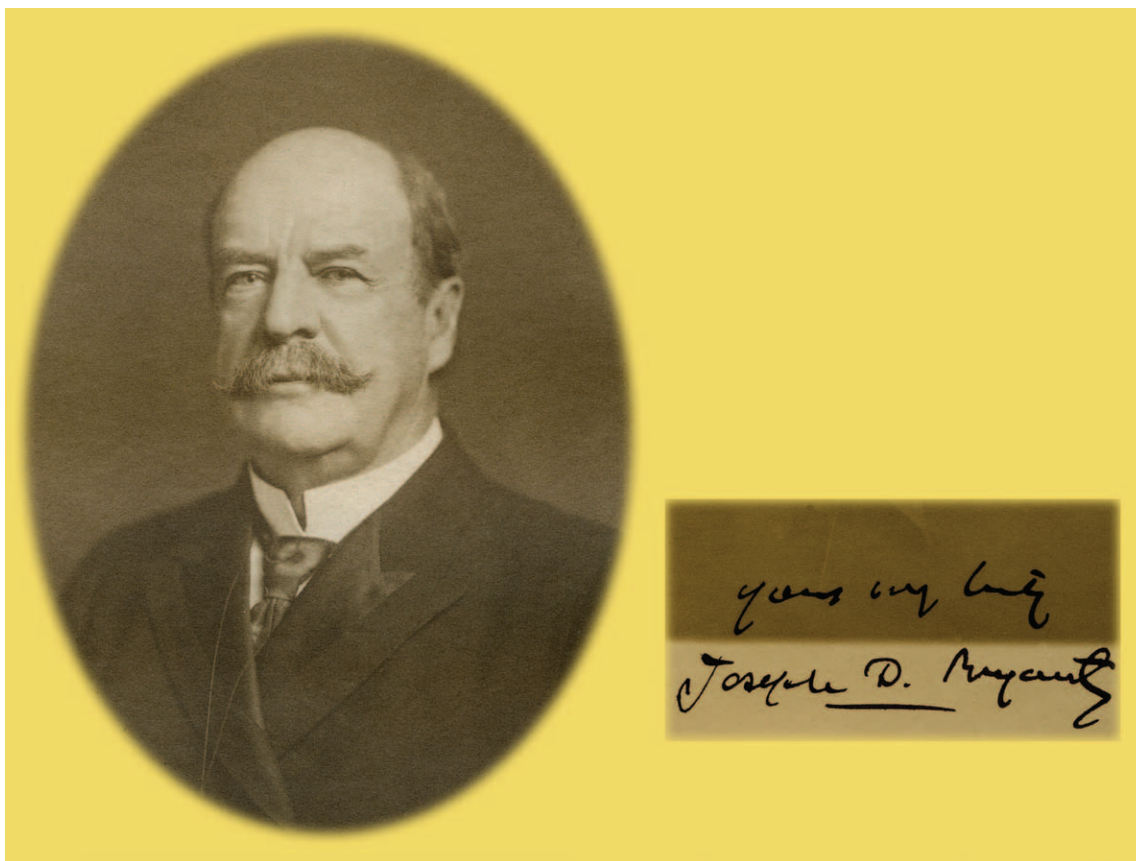

As the yacht *Oneida* steamed slowly along the Long Island Sound in July of 1893, U.S. President Grover Cleveland underwent oral cancer surgery which removed most of "his left upper jaw." The secret operation was coordinated by Cleveland's personal surgeon Joseph G. Bryant (*left*). Dr. Bryant arranged for his assistant surgeons William Keene and John Erdmann, for dentist-anesthetist Ferdinand Hasbrouck (nitrous oxide administrator), and for physicians Robert O'Reilly (etherist) and Edward Janeway (pulse monitor) to each embark and disembark from random ports—to both fool the press corps and guard the president's privacy. On the Wood Library-Museum's photoportrait of Dr. Bryant, he has signed his name (*right*) as "Joseph D. Bryant." (Copyright © the American Society of Anesthesiologists, Inc.)

George S. Bause, M.D., M.P.H., *Honorary Curator, ASA's Wood Library-Museum of Anesthesiology, Park Ridge, Illinois, and Clinical Associate Professor, Case Western Reserve University, Cleveland, Ohio.* UJYC@aol.com.
